# Supplementary material for: Akkermansia muciniphila ameliorates depressive disorders in a murine alcohol-LPS (mALPS) model
Source: Royal Society of Chemistry journal article supplement (doi:10.1039/d2fo01478e), 2022-01-01
Supplement: d2fo01478e1.pdf [file d2fo01478e1.pdf]

Supplementary information for

## *Akkermansia muciniphila* ameliorates depressive disorders in murine alcohol-LPS (mALPS) model

### Supplementary Figures Captions:

**Figure S1.** Binge alcohol consumption alone could not cause depression-like behavior in mice.

**Figure S2.** Impact of different dose of LPS on the serum LPS (A) and behaviors (B-E). \* $p < 0.05$ , \*\* $p < 0.01$ , ns: Non-significant.

**Figure S3.** Beta diversity in Control and LPS.

### Supplementary Table Caption:

**Table S1:** Primers used in quantitative PCR analysis

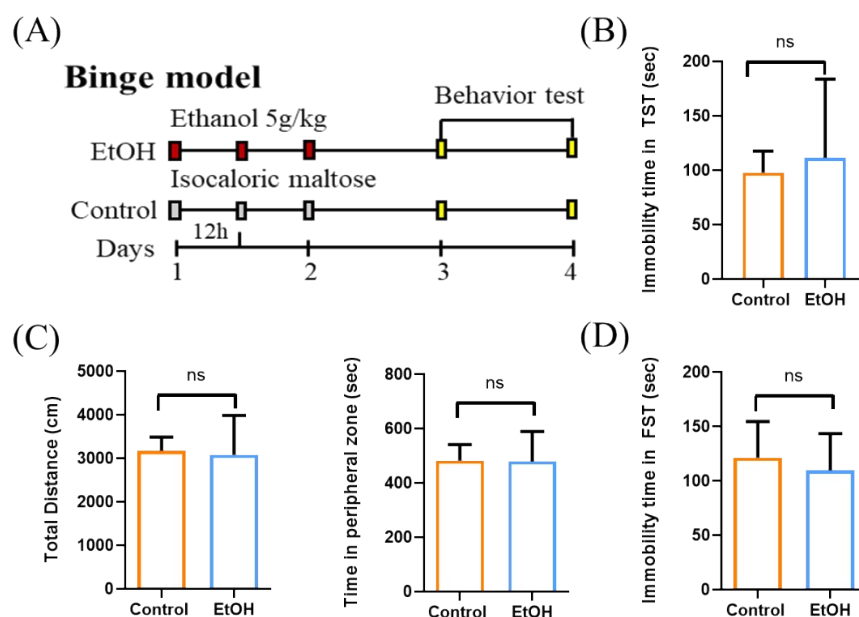

**Figure S1.** Binge alcohol consumption alone could not cause depression-like behavior in mice. (A)The timeline of binge alcohol-fed model of mice; (B)The impact of binge alcohol consumption in TST (C)The impact of binge alcohol consumption in the OFT:the total travel distance of mice in OFT(left), the time of mice spent in the peripheral zone in OFT(right); (D)The impact of binge alcohol consumption in FST;. ns: Non-significant.

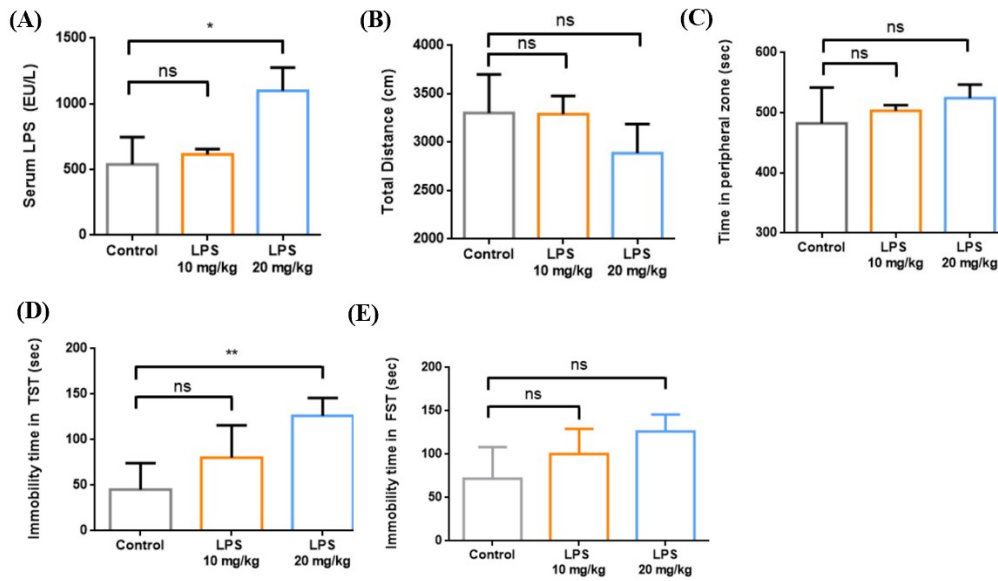

**Figure S2.** Impact of different dose of LPS on the serum LPS (A) and behaviors (B-E). \* $p < 0.05$ , \*\* $p < 0.01$ , ns: Non-significant.

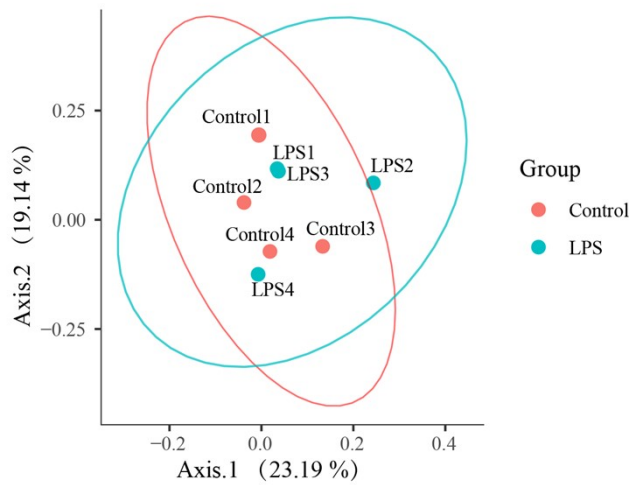

**Figure S3.** Beta diversity in Control and LPS.

**Table S1** Primers used in quantitative PCR analysis

| Gene          | Forward primer          | Reverse primer          |
|---------------|-------------------------|-------------------------|
| TNF- $\alpha$ | AGCCGATGGGTTGTA         | ACTTGGGCAGATTGA         |
| IL-1 $\beta$  | GCTTCAGGCAGGCAGTATCA    | TGCAGTTGTCTAATGGGAACG   |
| BDNF          | TCATACTTCGGTTGCATGAAGG  | AGACCTCTCGAACCTGCC      |
| IDO           | CGGACTGAGAGGACACAGGTTAC | ACACATACGCCATGGTAGTGTAC |

|        |                        |                         |
|--------|------------------------|-------------------------|
| Ocln   | ATGTCCGGCCGATGCTCTC    | TTTGGCTGCTCTTGGGTCTGTAT |
| Cldn-3 | TCATCGGCAGCAGCATCATCAC | ACGATGGTGATCTTGGCCTTGG  |
| GAPDH  | TCACCACCATGGAGAAGGC    | GCTAAGCAGTTGGTGGTGCA    |

---
